# Supplementary material for: Rapid electrochemical quantification of trace Hg2+ using a hairpin DNA probe and quantum dot modified screen-printed gold electrodes
Source: Royal Society of Chemistry journal article supplement (doi:10.1039/d2ra01817a), 2022-01-01
Supplement: d2ra01817a1.pdf [file d2ra01817a1.pdf]

**Rapid electrochemical quantification of trace Hg<sup>2+</sup> using hairpin DNA probe and  
quantum dots modified screen-printed gold electrodes**

Wancun Zhang <sup>a</sup>, Pin Zhang<sup>a</sup>, Ying Liang<sup>a</sup>, Weyland Cheng<sup>a</sup>, Lifeng Li <sup>a</sup>, Huanmin Wang <sup>a</sup>, Zhidan  
Yu<sup>a,\*</sup>, Yan Liu <sup>b,\*</sup>, Xianwei Zhang <sup>b,\*</sup>

<sup>a</sup> Henan Key Laboratory of Children's Genetics and Metabolic Diseases, Zhengzhou Key Laboratory  
of Precise Diagnosis and Treatment of Children's Malignant Tumors, Children's Hospital Affiliated to  
Zhengzhou University, Zhengzhou 450018, China

<sup>b</sup> Department of Medicine, The First Affiliated Hospital of Zhengzhou University, Zhengzhou, China

\* Corresponding author

E-mail addresses: [zhangxw956658@126.com](mailto:zhangxw956658@126.com) (Xianwei Zhang); [zhidanyu2013@126.com](mailto:zhidanyu2013@126.com) (Zhidan  
Yu); [lyJenny106@163.com](mailto:lyJenny106@163.com) (Yan Liu)

Tel: + 86-373-63866536

Fax:

+86-373-63866536

**Table S1** The sequences for developed HP-QDs-SPGE electrochemical biosensor

| Name              | Sequence (5'-3')                                                 |
|-------------------|------------------------------------------------------------------|
| Hairpin DNA probe | NH <sub>2</sub> -TTTTT CCTCAG <u>GCTGCGTAGTTGTGCTGATG</u> CTGAGG |
| Mismatched target | <b>CTTCTGCACTACTTCGCTGC</b>                                      |

Note: Bolded T's represent mismatched thymine residues and the underlined region represents the loop of the hairpin DNA probe.

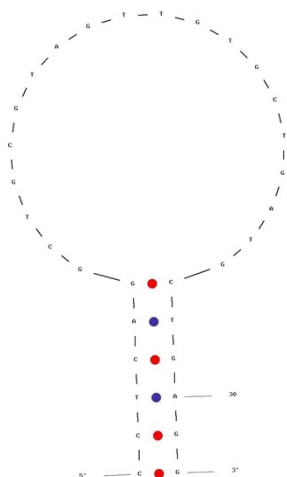

**Fig. S1** The secondary structure of the hairpin DNA probe predicted by Oligo Analyzer.

**Table S2** The LOD, linear range, reaction steps, detection time and complexity of various methods for the detection of Hg<sup>2+</sup>.

| Approaches                                | LOD     | Linear range    | Detection time | Reaction step | Complexity <sup>a</sup> | Ref       |
|-------------------------------------------|---------|-----------------|----------------|---------------|-------------------------|-----------|
| Paper-based approach                      | 574 nM  | 574 nM - 10 μM  | 30 min         | 3             | Simple                  | [1]       |
| fluorescence detection approach           | 0.05 μM | 0 –1.0 μM       | –              | 1             | Simple                  | [2]       |
| Visual detection approach                 | 20 nM   | 0 – 100 nM      | –              | 2             | Simple                  | [3]       |
| Molecular beacon-based fluorescent sensor | 1.9 nM  | 6 Nm – 600 nM   | 40 min         | 2             | Complex                 | [4]       |
| Photoelectrochemical sensor               | 12 nM   | 20 nM - 550 nM  | –              | 2             | Complex                 | [5]       |
| Luminescence-based approach               | 0.24 nM | 10 nM to 600 nM | 20 min         | 3             | Complex                 | [6]       |
| Developed approach                        | 0.11 pM | 10 pM to 1μM    | 15 min         | 2             | Simple                  | This work |

“–”: The proper data was not provided.

a “Complex” and “simple” represent the experimental procedure of the Hg<sup>2+</sup> approach is complex or easy.

LOD: Limit of detection;

## Reference

- [1] M. Phichi, A. Imyim, T. Tuntulani, W. Aeungmaitrepirom, Paper-based cation-selective optode sensor containing benzothiazole calix[4]arene for dual colorimetric Ag<sup>+</sup> and Hg<sup>2+</sup> detection, *Anal Chim Acta*, 1104(2020) 147-55.
- [2] D.Y. Li, S.P. Wang, F. Azad, S.C. Su, Single-step synthesis of polychromatic carbon quantum dots for macroscopic detection of Hg<sup>2+</sup>, *Ecotoxicol Environ Saf*, 190(2020) 110141.
- [3] L. Zhao, Z. Zhang, Y. Liu, J. Wei, Q. Liu, P. Ran, et al., Fibrous strips decorated with cleavable aggregation-induced emission probes for visual detection of Hg<sup>2+</sup>, *Journal of hazardous materials*, 385(2020) 121556.
- [4] H.B. Teh, H. Wu, X. Zuo, S.F.Y. Li, Detection of Hg<sup>2+</sup> using molecular beacon-based fluorescent sensor with high sensitivity and tunable dynamic range, *Sens Actuators, B*, 195(2014) 623-9.
- [5] Z. Li, W. Dong, X. Du, G. Wen, X. Fan, A novel photoelectrochemical sensor based on g-C<sub>3</sub>N<sub>4</sub>@CdS QDs for sensitive detection of Hg<sup>2+</sup>, *Microchemical Journal*, 152(2020) 104259.
- [6] Z. Li, H. Sun, X. Ma, R. Su, R. Sun, C. Yang, et al., Label-free fluorescence "turn-on" strategy for mercury (II) detection based on the T-Hg<sup>2+</sup>-T configuration and the DNA-sensitized luminescence of terbium (III), *Anal Chim Acta*, 1099(2020) 136-44.
